# Supplementary material for: Construction of a SNP-based genetic linkage map in cultivated peanut based on large scale marker development using next-generation double-digest restriction-site-associated DNA sequencing (ddRADseq)
Source: PubMed Central journal article supplement (PMC4035077; doi:10.1186/1471-2164-15-351), 2014-05-09

1A

2A

3A

4A

5A

6A

7A

8A

9A

10A

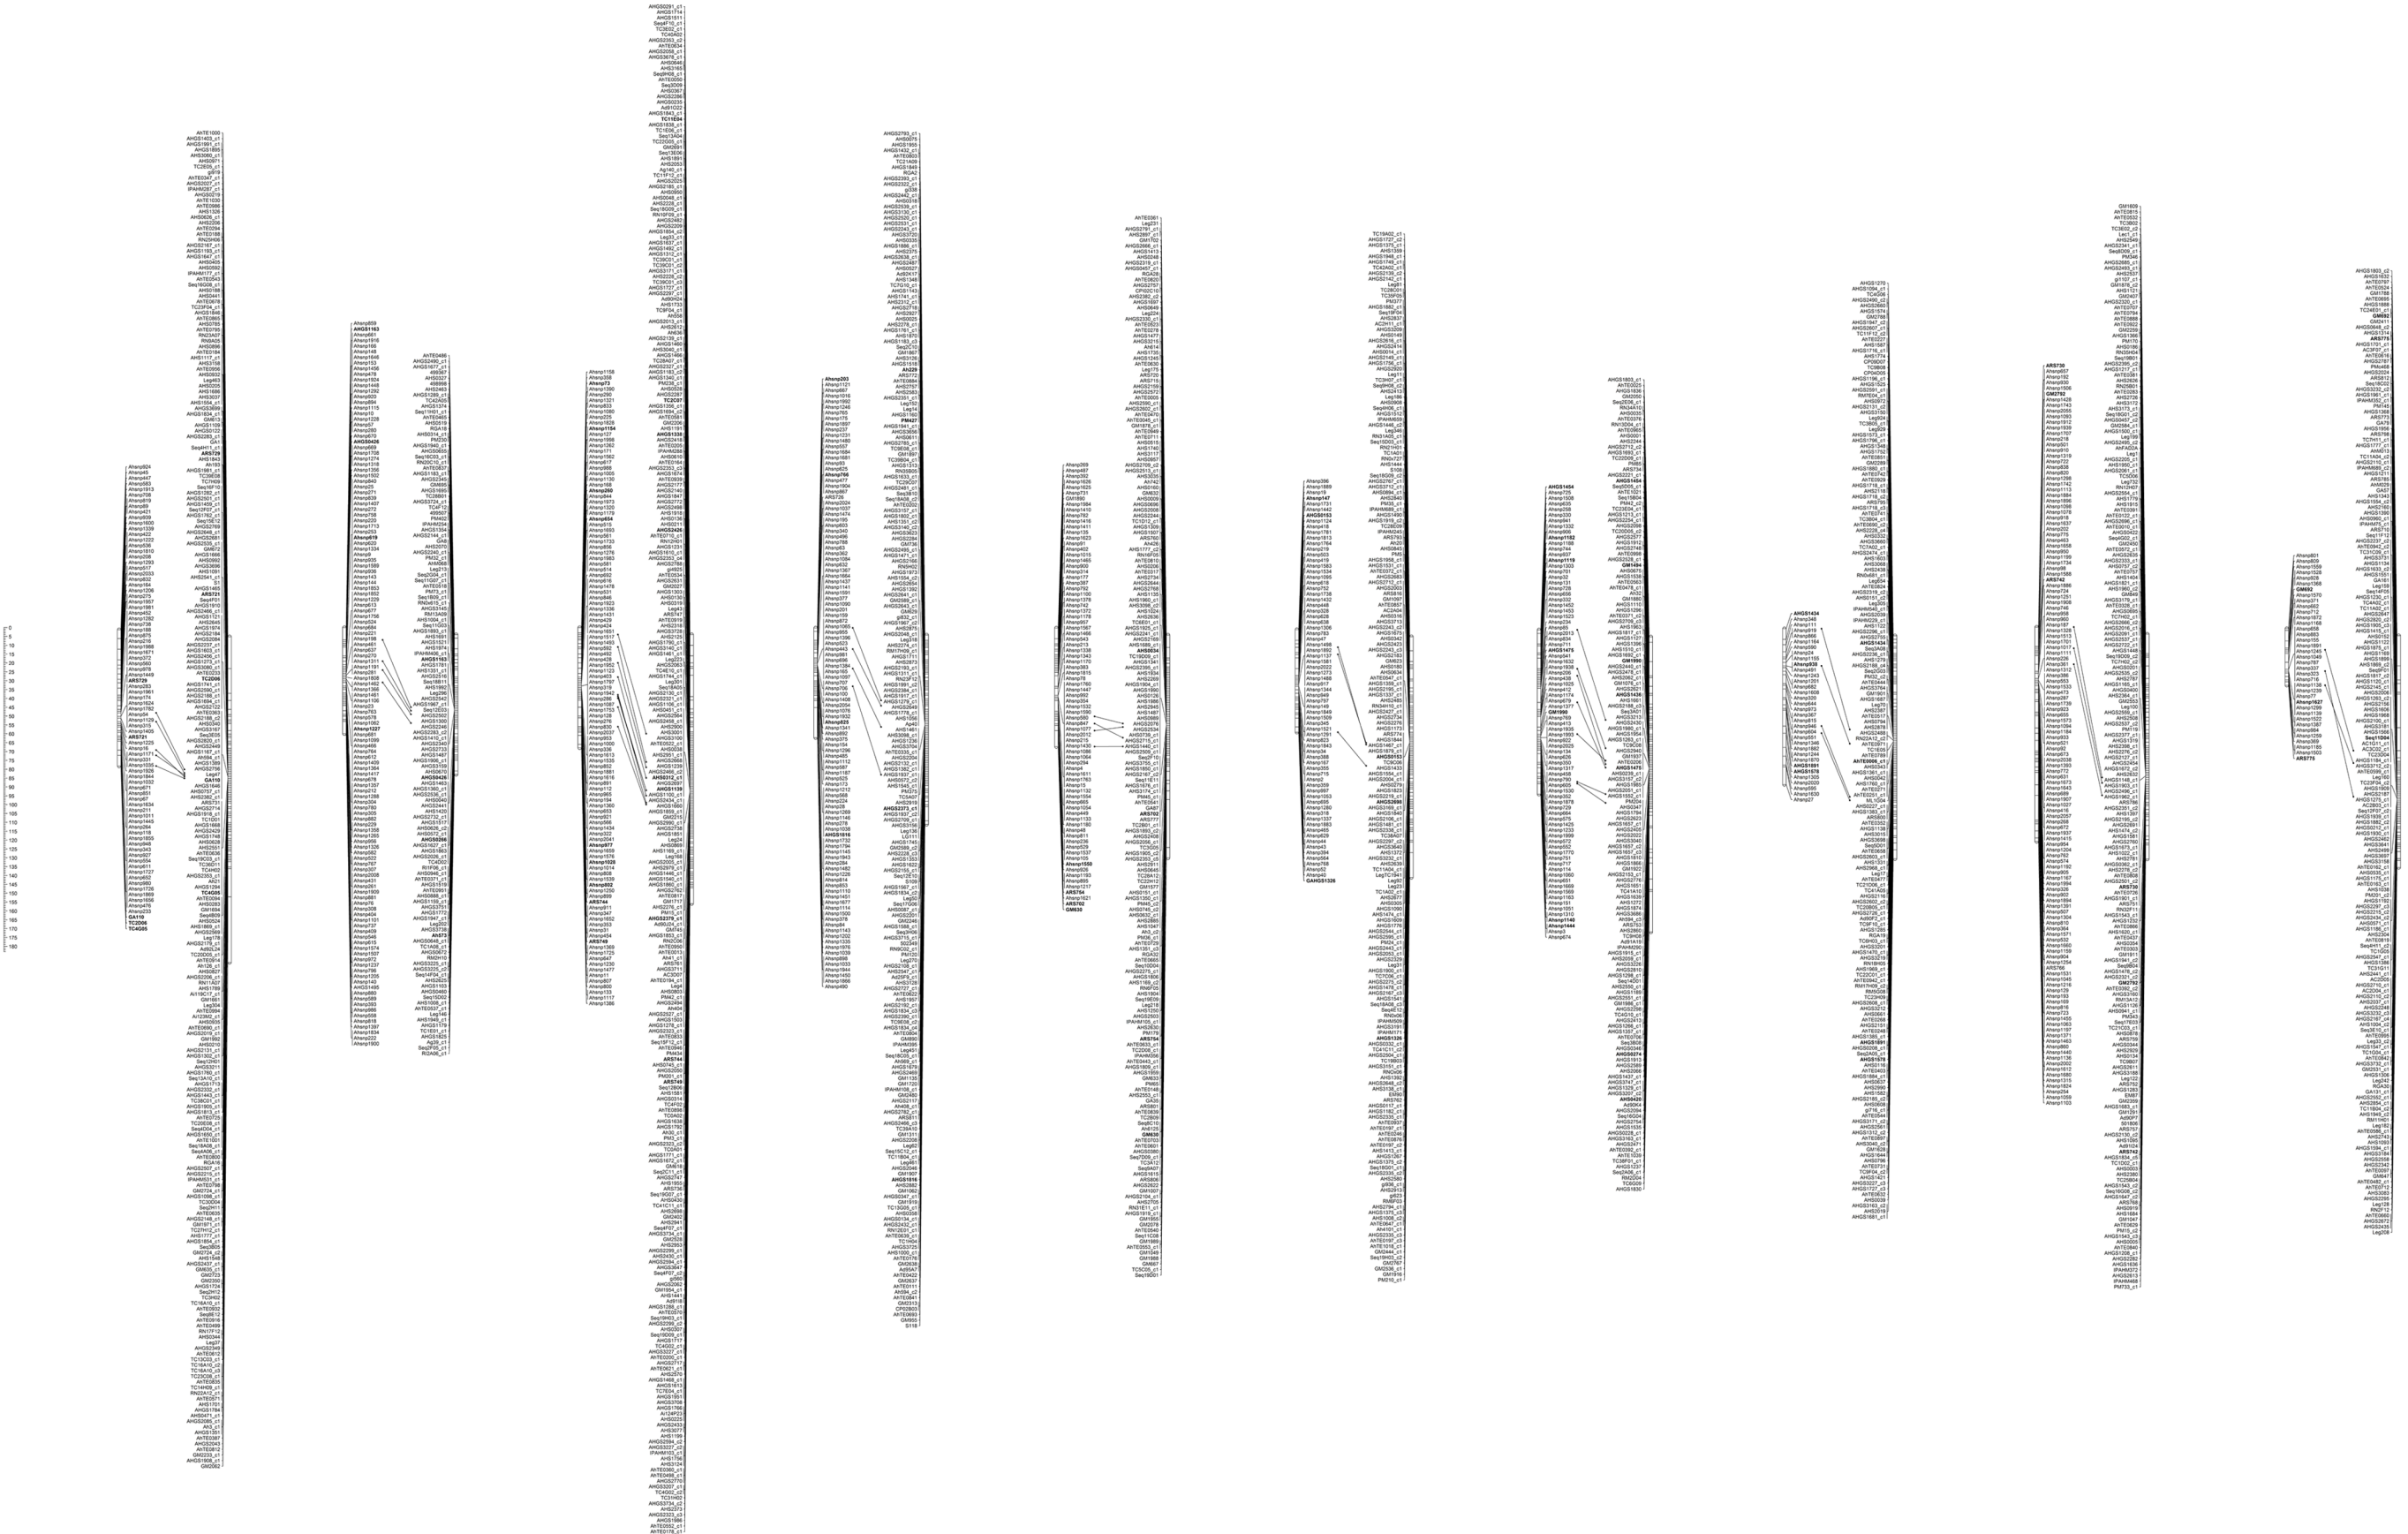

1B

2B

3B

4B

5B

6B

7B

8B

9B

10B

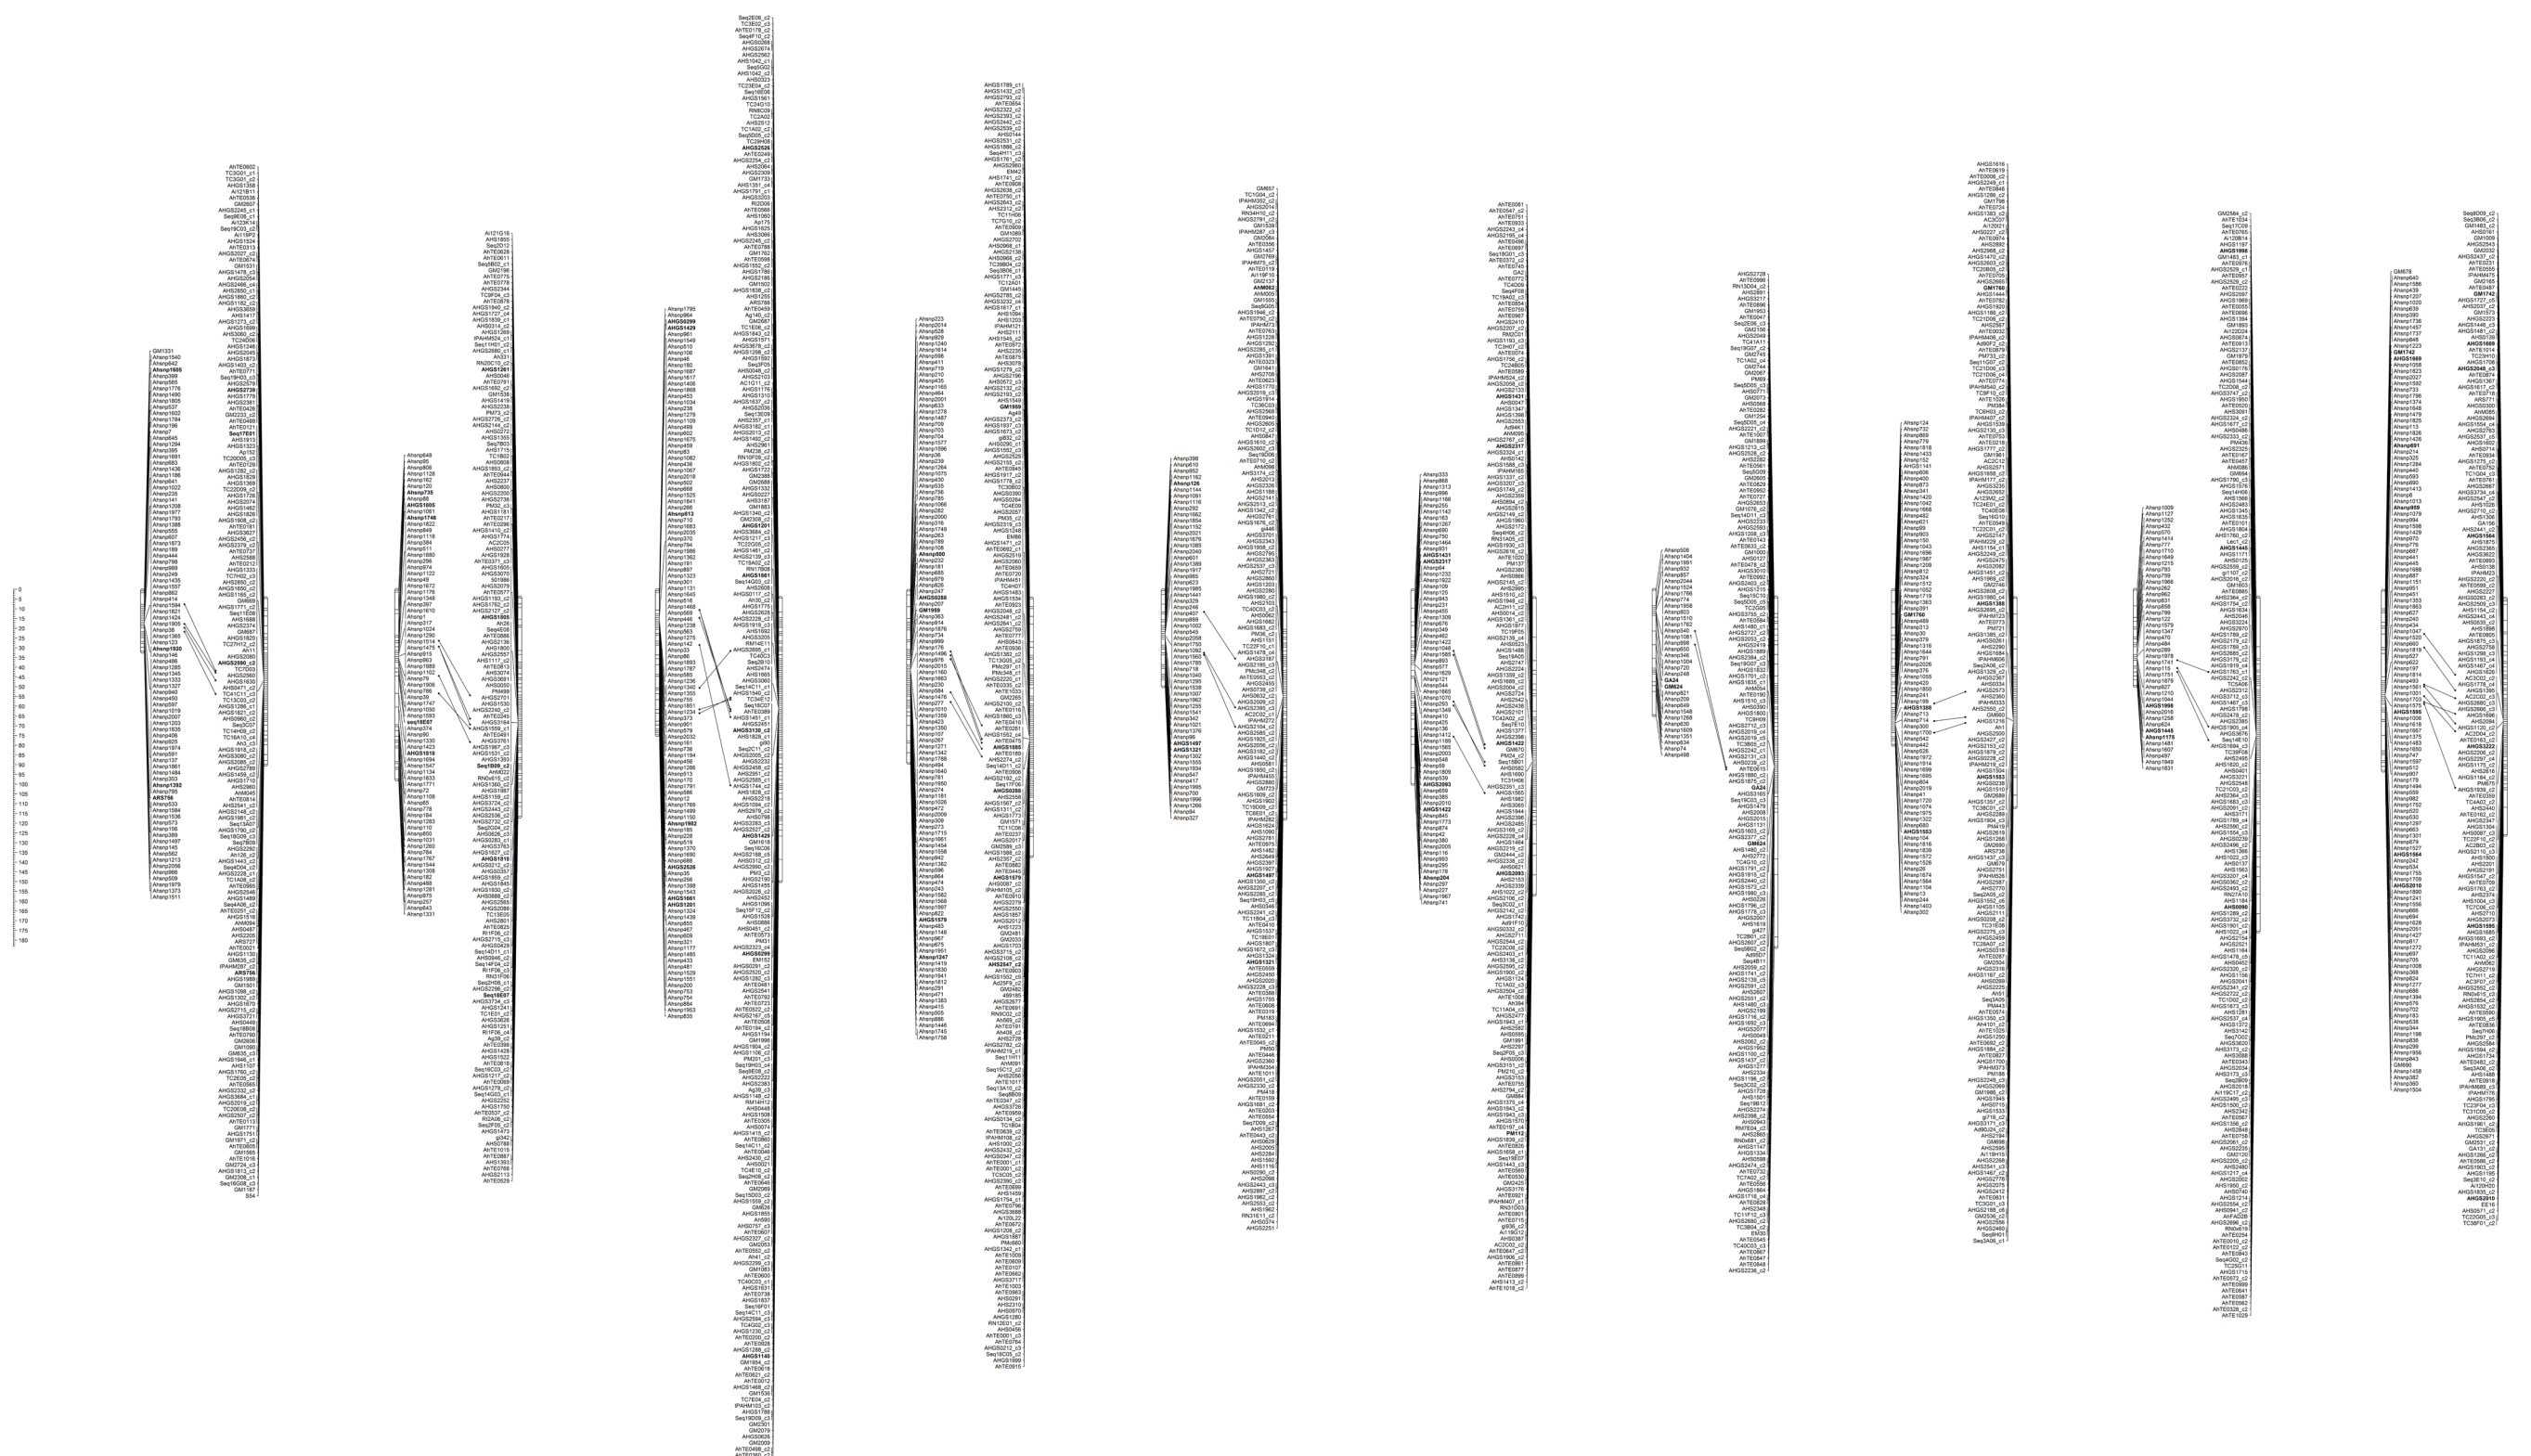

Supplement: 12864_2013_6048_MOESM3_ESM.pdf [file 12864_2013_6048_MOESM3_ESM.pdf]
